# Supplementary material for: A polymer-based turn-on fluorescent sensor for specific detection of hydrogen sulfide
Source: Royal Society of Chemistry journal article supplement (doi:10.1039/c3ra41019f), 2013-01-01
Supplement: c3ra41019f.pdf [file c3ra41019f.pdf]

# A Polymer-Based Turn-on Fluorescent Sensor for Specific Detection of Hydrogen Sulfide

Kai Sun, Xiaoli Liu, Yanyun Wang and Zhaoqiang Wu\*

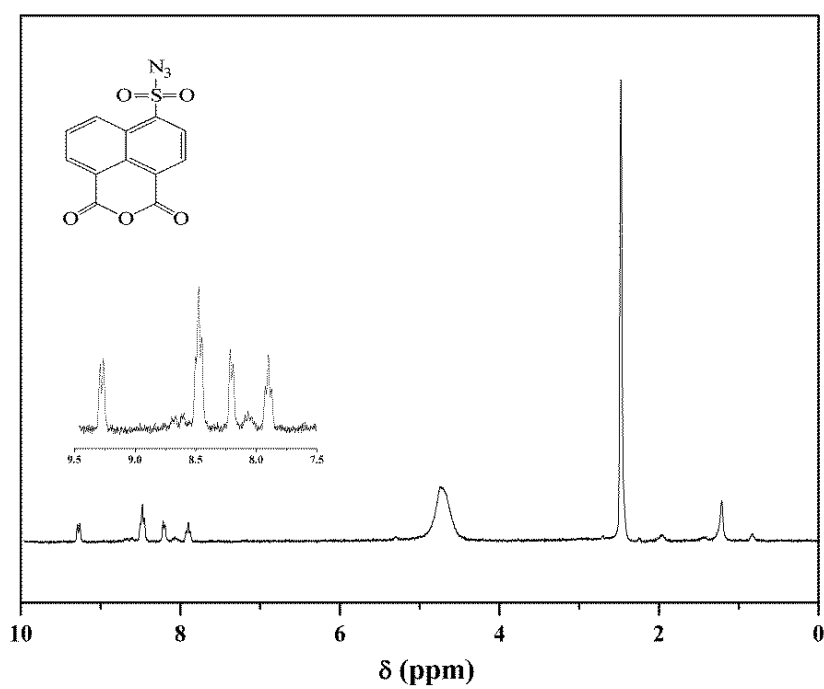

Figure S1. <sup>1</sup>H NMR spectra of compound 2

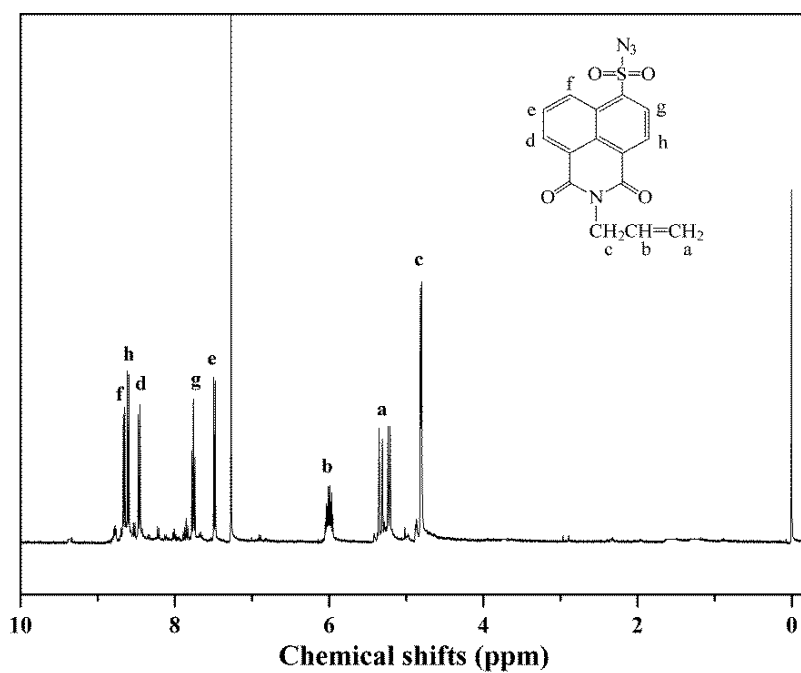

Figure S2. <sup>1</sup>H NMR spectra of AISA

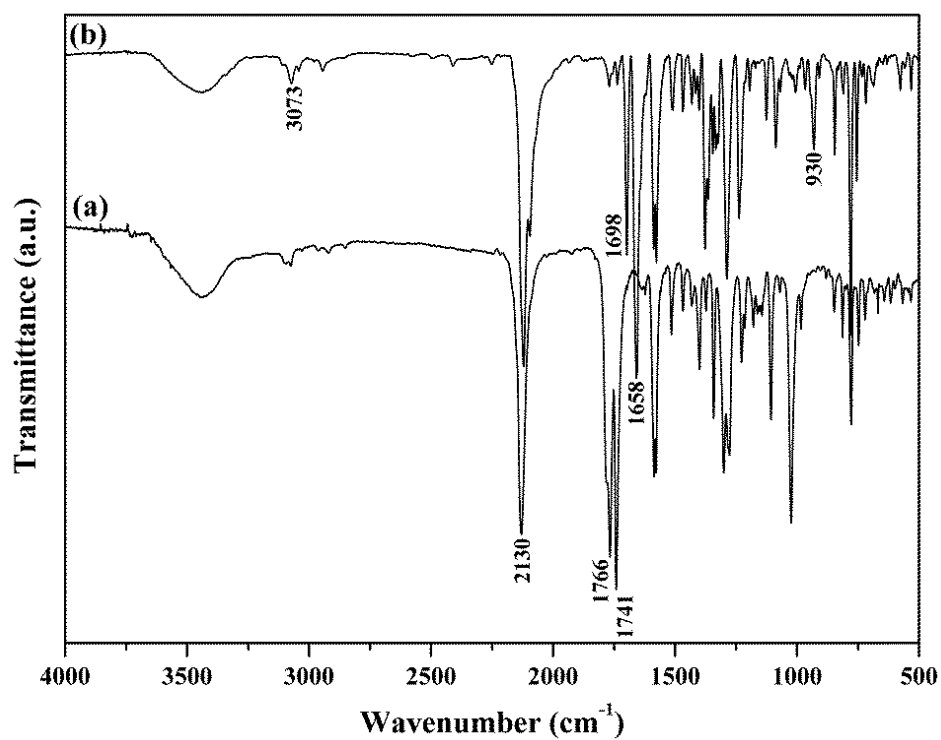

Figure S3. FT-IR spectra of (a) compound 2, (b) AISA

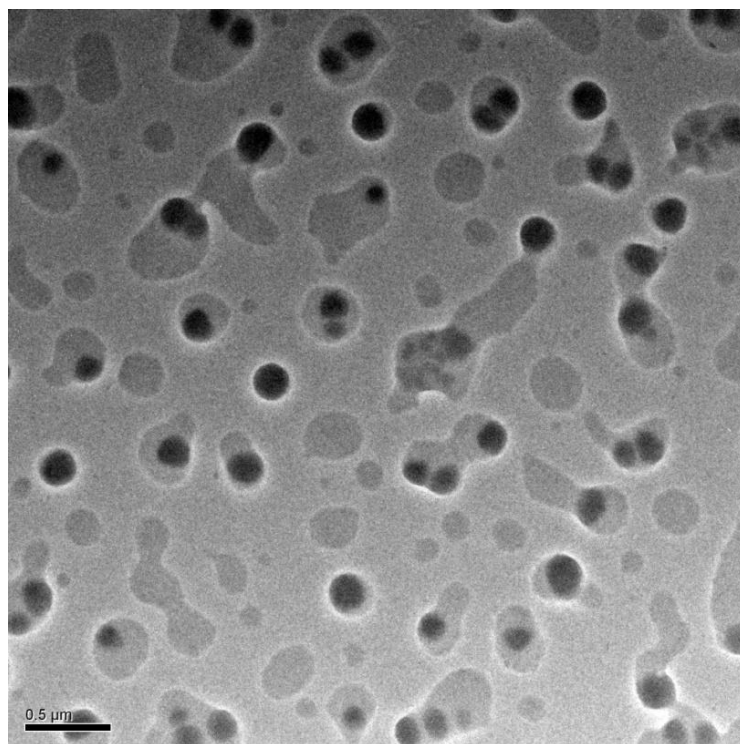

Figure S4. TEM images of PSAISA

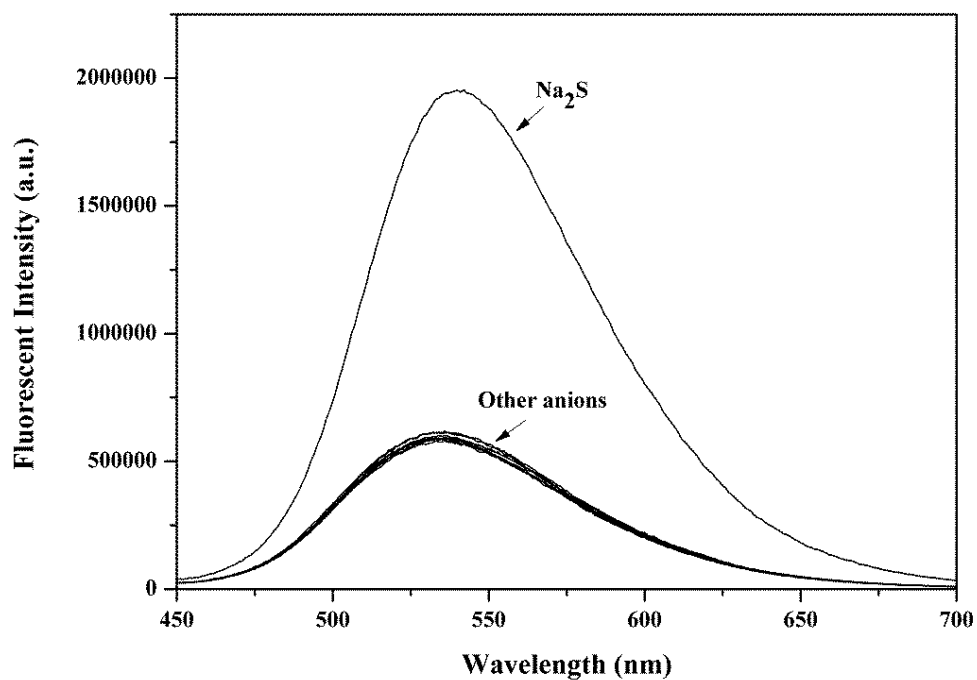

**Figure S5.** Fluorescence spectra of PSAISA (100  $\mu\text{g}/\text{mL}$ ) in PBS/ $\text{CH}_3\text{CN}$  (1/1, v/v, pH 7.4) in presence of different biologically relevant anions (1 mM  $\text{Cl}^-$ , 1 mM  $\text{Br}^-$ , 150  $\mu\text{M}$   $\text{HCO}_3^-$ , 150  $\mu\text{M}$   $\text{HSO}_3^-$ , 150  $\mu\text{M}$   $\text{SO}_4^{2-}$ , 150  $\mu\text{M}$   $\text{S}_2\text{O}_3^{2-}$ , 150  $\mu\text{M}$   $\text{SCN}^-$ , 300  $\mu\text{M}$   $\text{Na}_2\text{S}$  and cysteine).
